# Supplementary material for: The effect of PN-1, a Traditional Chinese Prescription, on the Learning and Memory in a Transgenic Mouse Model of Alzheimer’s Disease
Source: Hindawi journal article supplement (doi:10.1155/2013/518421), 2013-01-01
Supplement: f4 [file 518421.f4.pdf]

**Supplementary TABLE 2:** Serum biochemical parameters to evaluate liver and kidney function.

|                          | WT                 | Vehicle            | Aricept            | 0.6                | 1.2                |       |
|--------------------------|--------------------|--------------------|--------------------|--------------------|--------------------|-------|
| TB ( $\mu\text{mol/L}$ ) | 1.006 $\pm$ 0.30   | 0.834 $\pm$ 0.40   | 1.65 $\pm$ 0.26    | 1.104 $\pm$ 0.16   | 1.044 $\pm$ 0.30   | 0.97  |
| ALT (U/L)                | 49.38 $\pm$ 13.88  | 39.1 $\pm$ 7.99    | 41.92 $\pm$ 7.83   | 41.28 $\pm$ 4.12   | 34.24 $\pm$ 3.37   | 38.4  |
| AST (U/L)                | 146.08 $\pm$ 33.33 | 139.36 $\pm$ 13.18 | 129.28 $\pm$ 20.11 | 137.82 $\pm$ 21.90 | 129.54 $\pm$ 21.38 | 137.4 |
| Cr ( $\mu\text{mol/L}$ ) | 9.81 $\pm$ 1.26    | 10.43 $\pm$ 0.46   | 9.13 $\pm$ 1.25    | 9.96 $\pm$ 1.42    | 9.91 $\pm$ 0.92    | 9.19  |
| BUN (mmol/L)             | 10.14 $\pm$ 1.77   | 9.60 $\pm$ 3.00    | 9.41 $\pm$ 0.77    | 8.68 $\pm$ 1.95    | 7.13 $\pm$ 1.16    | 8.73  |

TB, total bilirubin, ALT, alanine aminotransferase, AST, aspartate aminotransferase, Cr, Creatinine, BUN, blood urea nitrogen
